# Supplementary material
Source: HighWire-hosted journal article supplement (https://pmj.bmj.com/content/postgradmedj-2020-139065)
Supplement: inline-supplementary-material-1 [file inline-supplementary-material-1.pdf]

## Supplementary Tables

**Table 1S: Vitamin D levels in the two groups during follow up**

| <b>25(OH)D3</b> | <b>Intervention<br/>n=16</b> | <b>Control<br/>n=24</b> | <b>p-value</b> |
|-----------------|------------------------------|-------------------------|----------------|
| <b>Baseline</b> | 8.6 (7.1 to 13.1)            | 9.5 (8.1 to 12.5)       | 0.730          |
| <b>Day-7</b>    | 51.0 (40.5 to 58.6)          | 15.3 (14.4 to 19.1)     | <0.001*        |
| <b>Day-14</b>   | 51.7 (48.9 to 59.5)          | 15.2 (12.7 to 19.5)     | <0.001*        |

Data represented as median (inter-quartile range)

\* P<0.05 considered significant

**Table 2S: Fibrinogen during follow up in the two groups**

| <b>Fibrinogen</b>         | <b>Intervention group<br/>(N=16)</b> | <b>Control group<br/>(N=24)</b> | <b>p-value</b> |
|---------------------------|--------------------------------------|---------------------------------|----------------|
| <b>D0 (ng/ml)</b>         | 3.82 (2.95 to 4.75)                  | 3.67(3.05 to 4.32)              | 0.668          |
| <b>D7 (ng/ml)</b>         | 3.21(2.92 to 4.33)                   | 3.63(2.6 to 4.43)               | 0.956          |
| <b>DL (ng/ml)</b>         | 3.04 (2.42 to 4.16)                  | 3.42(2.53 to 4.20)              | 0.648          |
| <b>ΔFibrinogen(ng/ml)</b> | -0.64(-1.41 to 0.11)                 | 0.06 (0.01 to 0.51)             | 0.007*         |

Data represented as median (Inter-quartile range)

D0: Baseline Value

D7: Day-7 value

L: Last observed value

Δ:Last Available Value-Baseline value

\* P<0.05 considered significant

**Table 3S: D-Dimer during follow up in the two groups**

| <b>D-Dimer</b>        | <b>Intervention group<br/>(N=16)</b> | <b>Control group<br/>(N=24)</b> | <b>p-value</b> |
|-----------------------|--------------------------------------|---------------------------------|----------------|
| <b>D-Dimer (D1)</b>   | 330(250.98 to 535)                   | 236.8(178.4 to 413.2)           | 0.132          |
| <b>D-Dimer (D2)</b>   | 224.5(92.9 to 396.8)                 | 231.5(112.9 to 393.7)           | 0.986          |
| <b>D-Dimer (D3)</b>   | 270(132.6 to 413.5)                  | 191.7(98.3 to 270)              | 0.697          |
| <b>Δ D-Dimer(g/L)</b> | -40(-218.8 to 89.3)                  | -31.3(-207.2 to 0)              | 0.459          |

Data represented as median (Inter-quartile range)

D0: Baseline Value

D7: Day-7 value

L: Last observed value

Δ:Last Available Value-Baseline value

\* P<0.05 considered significant

**Table 4S: Procalcitonin during follow up in the two groups**

| <b>Procalcitonin</b>              | <b>Intervention group<br/>(N=16)</b> | <b>Control group<br/>(N=24)</b> | <b>p-value</b> |
|-----------------------------------|--------------------------------------|---------------------------------|----------------|
| <b>D0(mg/L)</b>                   | 0.02 (0.02 to 0.04)                  | 0.03(0.02 to 0.05)              | 0.157          |
| <b>D7 (mg/L)</b>                  | 0.02 (0.01 to 0.02)                  | 0.02 (0.02 to 0.06)             | 0.028          |
| <b>DL (mg/L)</b>                  | 0.02 (0.01 to 0.03)                  | 0.03 (0.02 to 0.08)             | 0.008          |
| <b>Δ Procalcitonin<br/>(mg/L)</b> | 0.0(-0.01 to 0.0)                    | 0.0 (0.00 to 0.00)              | 0.505          |

Data represented as median (Inter-quartile range)

D0: Baseline Value

D7: Day-7 value

L: Last observed value

Δ:Last Available Value-Baseline value

\* P<0.05 considered significant

**Table 5S: C-reactive protein during follow up in the two groups**

| <b>CRP</b>          | <b>Intervention group<br/>(N=16)</b> | <b>Control group<br/>(N=24)</b> | <b>p-value</b> |
|---------------------|--------------------------------------|---------------------------------|----------------|
| <b>D0(ng/ml)</b>    | 2.4 (0.9 to 3.2)                     | 2.1 (0.54 to 7.4)               | 0.804          |
| <b>D7(ng/ml)</b>    | 2.9 (1.1 to 4.7)                     | 2.3 (0.8 to 11.4)               | 0.921          |
| <b>DL(ng/ml)</b>    | 1.8 (1.1 to 2.6)                     | 1.23 (0.6 to 3.0)               | 0.804          |
| <b>Δ CRP(ng/ml)</b> | -0.3 (-1.4 to 0.2)                   | 0.0 (-0.9 to 0.3)               | 0.507          |

Data represented as median (Inter-quartile range)

CRP: C-reactive protein

D0: Baseline Value

D7: Day-7 value

L: Last observed value

Δ: Last Available Value-Baseline value

\* P<0.05 considered significant

**Table 6S: Serum Ferritin during follow up in the two groups**

| <b>Ferritin</b>          | <b>Intervention group<br/>(N=16)</b> | <b>Control group<br/>(N=24)</b> | <b>p-value</b> |
|--------------------------|--------------------------------------|---------------------------------|----------------|
| <b>D0 (ng/ml)</b>        | 72.3(42 to 168)                      | 48.7(18.2 to 113)               | 0.238          |
| <b>D7 (ng/ml)</b>        | 61.3(46.2 to 109)                    | 39.3(21.3 to 150.8)             | 0.735          |
| <b>DL(ng/ml)</b>         | 103.3(39.7 to 188.4)                 | 61.8(24.9 to 102.9)             | 0.284          |
| <b>Δ Ferritin(ng/ml)</b> | -0.8(-9.3 to 0.0)                    | 0.0(-17.6 to 3.7)               | 0.741          |

Data represent as median (Inter-quartile range)

D0: Baseline value

D7: Day-7 value

L: Last observed value

\*P<0.05 considered significant

**Table 7S: Serum calcium and phosphorus in the two groups during follow up**

| Parameter                     | Intervention group<br>(N=16) | Control group<br>(N=24) | p-value |
|-------------------------------|------------------------------|-------------------------|---------|
| Calcium (mg/dl)<br>(baseline) | 9.4 (9.2 to 9.7)             | 8.8 (8.0-9.2)           | 0.042*  |
| Calcium (mg/dl)<br>(d7)       | 8.83 (5.4 to 12.2)           | 8.85 (8.5 to 9.1)       | 0.894   |
| Calcium (mg/dl)<br>(L)        | 8.91 (6.2 to 11.5)           | 9.15 (9.0 to 9.3)       | 0.283   |
| Phosphorus (mg/dl)<br>(D0)    | 4.0 (2.1 to 6.2)             | 3.3 (3.1 to 3.8)        | 0.121   |
| Phosphorus (mg/dl)<br>(d7)    | 3.6 (3.2 to 3.8)             | 2.0 (1.7 to 2.0 )       | 0.595   |
| Phosphorus (mg/dl)<br>(L)     | 3.6 (3.1 to 4.2 )            | 2.0 (1.5 to 2.0)        | 0.637   |

Data represented as median (Inter-quartile range)

d7: Day-7 value

L: Last observed value

\* P<0.05 considered significant
